# Supplementary material for: Comparative Effectiveness of Cryotherapy and Radiofrequency Ablation for Chronic Rhinitis: A Systematic Review and Meta-analysis
Source: PubMed Central journal article supplement — Clin Exp Otorhinolaryngol. 2023 Oct 23;16(4):369–79. doi: 10.21053/ceo.2023.01214 (PMC10710917; doi:10.21053/ceo.2023.01214), 2023-10-23
Supplement: ceo-2023-01214-Supplementary-Table-2.pdf [file ceo-2023-01214-Supplementary-Table-2.pdf]

Supplementary Table 2. Individual randomized controlled trial methodological quality

| Study                          | Random sequence generation | Allocation concealment | Blinding of participants and personnel | Blinding of outcome assessment | Incomplete outcome data addressed | Free of selective reporting | Risk of bias of randomized studies |
|--------------------------------|----------------------------|------------------------|----------------------------------------|--------------------------------|-----------------------------------|-----------------------------|------------------------------------|
| Stolovitzky et al. (2021) [11] | Yes                        | Yes                    | Yes                                    | No                             | Yes                               | Yes                         | Risk of bias (high)                |
| Del Signore et al. (2022) [12] | Yes                        | Yes                    | Yes                                    | No                             | Yes                               | Yes                         | Risk of bias (high)                |
